# Supplementary material
Source: Springer Nature journal article supplement (https://www.springermedizin.de/resource/supplementary/12957_2013_1714_MOESM10_ESM.pdf/9563310)

Fig3

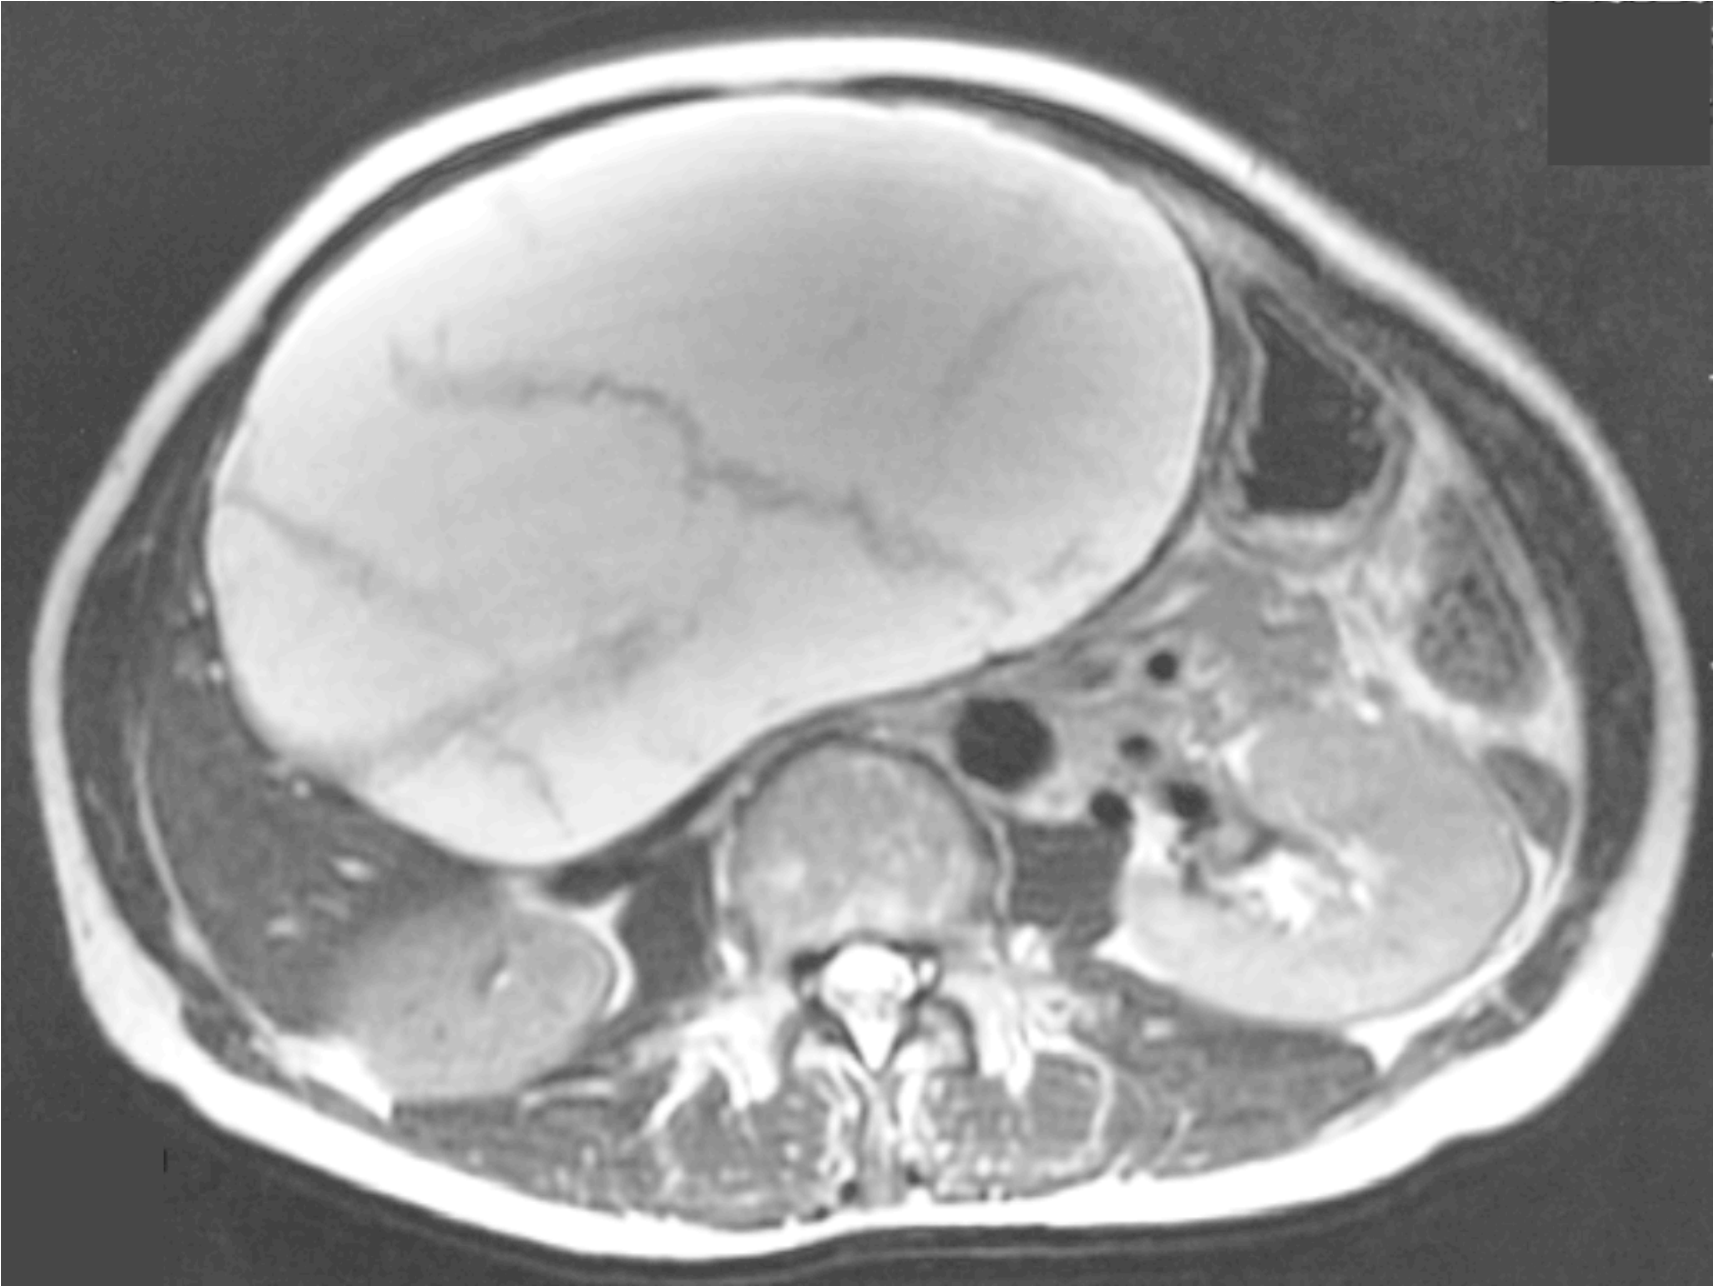

Supplement: MOESM10 [file 9563310]
